# Supplementary material for: Developing machine learning models to predict multi-class functional outcomes and death three months after stroke in Sweden
Source: PubMed Central journal article supplement (PMC11090298; doi:10.1371/journal.pone.0303287), 2024-05-13
Supplement: pone.0303287.s004.pdf [file pone.0303287.s004.pdf]

**S1 Table. Comparison of patients' characteristics at three months follow-up.**

Summary statistics reported as number of patients (%) for binary variables, median (quartiles) for categorical variables, and mean (standard deviation) for continuous variables.

| Variable                                    | Patients with complete mRS at 3-months follow-up |               | Patients still alive at 3 months but lost to follow-up |              | p-value |
|---------------------------------------------|--------------------------------------------------|---------------|--------------------------------------------------------|--------------|---------|
|                                             |                                                  | Missing (%)   |                                                        | Missing (%)  |         |
| <b>Number of patients (%)</b>               | 102,135 (79.6)                                   |               | 26,225 (20.4)                                          |              |         |
| Age (mean [SD])                             | 75.8 [12.0]                                      | -             | 72.7 [13.9]                                            | -            | <0.001  |
| Male (%)                                    | 54,473 (53.3)                                    | -             | 14,512 (55.3)                                          |              | <0.001  |
| Atrial Fibrillation (%)                     | 30,195 (29.6)                                    | 152 (0.2)     | 6,895 (26.3)                                           | 152 (0.6)    | <0.001  |
| Diabetes (%)                                | 22,355 (21.9)                                    | 214 (0.2)     | 6,367 (24.3)                                           | 170 (0.6)    | <0.001  |
| Previous Stroke or TIA (%)                  | 27,787 (27.2)                                    | 186 (0.2)     | 7,358 (28.1)                                           | 181 (0.7)    | <0.001  |
| Smoking (%)                                 | 11,394 (11.2)                                    | 14,252 (14.0) | 4,326 (16.5)                                           | 3,669 (14.0) | <0.001  |
| Blood pressure (BP) lowering medication (%) | 65,004 (63.6)                                    | 395 (0.4)     | 15,820 (60.3)                                          | 242 (0.9)    | <0.001  |
| Lipid-lowering drugs (%)                    | 32,616 (31.9)                                    | 441 (0.4)     | 8,130 (31.0)                                           | 262 (1.0)    | <0.001  |
| Prior anticoagulation (%)                   | 15,824 (15.5)                                    | 318 (0.3)     | 3,640 (13.9)                                           | 214 (0.8)    | <0.001  |
| Pre-stroke mRS (%)                          |                                                  | 5,199 (5.1)   |                                                        | 1,240 (4.9)  | <0.001  |
| 0–2 (Reference)                             | 69,795 (68.3)                                    |               | 17,798 (70.6)                                          |              |         |
| 3                                           | 14,772 (14.4)                                    |               | 4,170 (16.5)                                           |              |         |
| 4                                           | 9,352 (9.2)                                      |               | 2,411 (9.6)                                            |              |         |
| 5                                           | 3,017 (3.0)                                      |               | 606 (2.4)                                              |              |         |

| Variable                              | Patients with complete mRS at 3-months follow-up |                | Patients still alive at 3 months but lost to follow-up |               | p-value |
|---------------------------------------|--------------------------------------------------|----------------|--------------------------------------------------------|---------------|---------|
| Inpatient at time of stroke (%)       | 6,184 (6.1)                                      | 2 (0.0)        | 1,691 (6.4)                                            | 30 (0.1)      | <0.001  |
| NIHSS at arrival (median [Q1-Q3])     | 3.0 [1.0–8.0]                                    | 43,474 (42.6%) | 3.0 [1.0–7.0]                                          | 11,552 (44.0) | <0.001  |
| Type of stroke (%)                    |                                                  |                |                                                        |               |         |
| Ischemic (Reference)                  | 87,594 (85.8)                                    | -              | 22,754 (86.8)                                          | -             | <0.001  |
| Hemorrhagic                           | 13,511 (13.2)                                    | -              | 3,246 (12.4)                                           | -             | 0.0003  |
| Unspecified                           | 1,030 (1.0)                                      | -              | 225 (0.9)                                              | -             | 0.0297  |
| Wake-up stroke (%)                    | 18,635 (18.2)                                    | 18,729 (18.3)  | 4,519 (17.2)                                           | 5,443 (20.8)  | <0.001  |
| Stroke alert activation (%)           | 35,277 (34.5)                                    | 1,319 (1.3)    | 8,496 (32.4)                                           | 559 (2.1)     | <0.001  |
| Ambulance service to the hospital (%) | 70,786 (69.3)                                    | 8,469 (8.3)    | 17,674 (67.4)                                          | 2,522 (9.6)   | <0.001  |
| Hour of Admission (%)                 |                                                  | 4,021 (3.9)    |                                                        | 1,400 (5.3)   |         |
| 00–04 (Reference)                     | 4,332 (4.2)                                      |                | 1,103 (4.2)                                            |               | <0.001  |
| 04–08                                 | 5,852 (5.7)                                      |                | 1,273 (4.9)                                            |               | <0.001  |
| 08–12                                 | 29,094 (28.5)                                    |                | 6,889 (26.3)                                           |               | <0.001  |
| 12–16                                 | 27,870 (27.3)                                    |                | 7,184 (27.4)                                           |               | <0.001  |
| 16–20                                 | 19,396 (19.0)                                    |                | 5,315 (20.3)                                           |               | <0.001  |
| 20–24                                 | 11,570 (11.3)                                    |                | 3,061 (11.7)                                           |               | <0.001  |
| Day of week of admission (%)          |                                                  | 44 (0.04)      |                                                        | 154 (0.6)     |         |
| Sunday (Reference)                    | 13,214 (12.9)                                    |                | 3,352 (12.8)                                           |               | <0.001  |
| Monday                                | 16,255 (15.9)                                    |                | 4,143 (15.8)                                           |               | <0.001  |
| Tuesday                               | 15,377 (15.1)                                    |                | 4,022 (15.3)                                           |               | <0.001  |
| Wednesday                             | 15,147 (14.8)                                    |                | 3,818 (14.6)                                           |               | <0.001  |
| Thursday                              | 14,740 (14.4)                                    |                | 3,855 (14.7)                                           |               | <0.001  |
| Friday                                | 14,446 (14.1)                                    |                | 3,685 (14.1)                                           |               | <0.001  |

| Variable | Patients with complete mRS at 3-months follow-up |        | Patients still alive at 3 months but lost to follow-up |        | p-value |
|----------|--------------------------------------------------|--------|--------------------------------------------------------|--------|---------|
| Saturday | 12,912                                           | (12.6) | 3,196                                                  | (12.2) | <0.001  |
