# Supplementary material for: Developing machine learning models to predict multi-class functional outcomes and death three months after stroke in Sweden
Source: PubMed Central journal article supplement (PMC11090298; doi:10.1371/journal.pone.0303287), 2024-05-13
Supplement: pone.0303287.s005.pdf [file pone.0303287.s005.pdf]

**S2 Table. Model hyperparameters search space (selected based on best guess).** The best hyperparameter values obtained from the algorithm are presented in the last column of the table. Meaning of these hyperparameters can be obtained from the SKlearn library [1].

| Model (Multi-class) | Hyperparameter           | Search space        | Best parameter   |
|---------------------|--------------------------|---------------------|------------------|
| LR*                 | multi_class              | -                   | 'multinomial'    |
|                     | penalty                  | -                   | 'none'           |
|                     | class_weight             | -                   | 'balanced'       |
|                     | solver                   | -                   | 'saga'           |
|                     | max_iter                 | -                   | 10000            |
|                     | n_jobs                   | -                   | -1               |
|                     | random_state             | -                   | 48572            |
|                     | <i>dual</i>              | -                   | <i>False</i>     |
|                     | <i>tol</i>               | -                   | <i>0.0001</i>    |
|                     | <i>C</i>                 | -                   | <i>1.0</i>       |
|                     | <i>fit_intercept</i>     | -                   | <i>True</i>      |
|                     | <i>intercept_scaling</i> | -                   | <i>1</i>         |
|                     | <i>verbose</i>           | -                   | <i>0</i>         |
|                     | <i>warm_start</i>        | -                   | <i>False</i>     |
| <i>l1_ratio</i>     | -                        | <i>None</i>         |                  |
| XGBoost             | max_depth                | list(range(5, 9))   | 6                |
|                     | learning_rate**          | 0.2                 | 0.2              |
|                     | n_estimators             | [120, 80, 150, 100] | 150              |
|                     | objective**              | 'multi:softprob'    | 'multi:softprob' |
|                     | gamma                    | [0.001, 1, 0.1]     | 0.001            |
|                     | min_child_weight         | [10, 20, 15]        | 10               |
|                     | subsample                | [0.5, 0.7]          | 0.7              |
|                     | colsample_bytree**       | 0.5                 | 0.5              |

| Model (Multi-class) | Hyperparameter              | Search space                   | Best parameter  |
|---------------------|-----------------------------|--------------------------------|-----------------|
|                     | colsample_bylevel**         | 0.5                            | 0.5             |
|                     | colsample_bynode**          | 0.5                            | 0.5             |
|                     | reg_alpha                   | [0.001, 0.01, 1]               | 1               |
|                     | reg_lambda                  | [2, 1, 1.5, 5]                 | 1               |
|                     | seed**                      | 48572                          | 48572           |
|                     | scale_pos_weight***         | -                              | -               |
|                     | eval_metric**               | 'mlogloss'                     | 'mlogloss'      |
|                     | early_stopping_rounds**     |                                | 10              |
|                     | <i>base_score</i>           |                                | <i>None</i>     |
|                     | <i>booster</i>              |                                | <i>'gbtree'</i> |
|                     | <i>enable_categorical</i>   |                                | <i>False</i>    |
|                     | <i>importance_type</i>      |                                | <i>None</i>     |
|                     | <i>tree_method</i>          |                                | <i>None</i>     |
|                     | <i>use_label_encoder</i>    |                                | <i>False</i>    |
|                     | <i>max_leaves</i>           |                                | <i>None</i>     |
|                     | <i>grow_policy</i>          |                                | <i>None</i>     |
|                     | <i>max_bin</i>              |                                | <i>None</i>     |
|                     | <i>verbosity</i>            |                                | 3               |
|                     | <i>monotone_constraints</i> |                                | <i>None</i>     |
|                     | <i>nthread</i>              |                                | <i>None</i>     |
| SVM                 | C                           | [25, 50, 20, 10]               | 50              |
|                     | kernel                      | ['sigmoid', 'rbf']             | 'rbf'           |
|                     | gamma                       | ['scale', 1, 0.01, 0.1, 0.001] | 0.01            |
|                     | class_weight**              | 'balanced'                     | 'balanced'      |
|                     | probability**               | True                           | True            |
|                     | random_state**              | 48572                          | 48572           |
|                     | <i>coef0</i>                |                                | <i>0.0</i>      |

| Model (Multi-class) | Hyperparameter                 | Search space                                 | Best parameter |
|---------------------|--------------------------------|----------------------------------------------|----------------|
|                     | <i>shrinking</i>               |                                              | <i>True</i>    |
|                     | <i>tol</i>                     |                                              | <i>0.001</i>   |
|                     | <i>cache_size</i>              |                                              | <i>200</i>     |
|                     | <i>verbose</i>                 |                                              | <i>False</i>   |
|                     | <i>max_iter</i>                |                                              | <i>-1</i>      |
|                     | <i>decision_function_shape</i> |                                              | <i>'ovr'</i>   |
|                     | <i>break_ties</i>              |                                              | <i>False</i>   |
| ANN                 | <i>hidden_layer_sizes</i>      | [(50,50 ), (200, 200), (10,10 ), (100,100 )] | (10,10 )       |
|                     | <i>alpha</i>                   | [0.0001, 0.00001, 1, 0.01]                   | 0.0001         |
|                     | <i>batch_size</i>              | [60, 1500, 500, 1000]                        | 60             |
|                     | <i>random_state**</i>          | 48572                                        | 48572          |
|                     | <i>max_iter</i>                | [10000, 20000, 15000]                        | 10000          |
|                     | <i>n_iter_no_change</i>        | [10, 300, 100, 30]                           | 100            |
|                     | <i>early_stopping**</i>        | True                                         | True           |
|                     | <i>validation_fraction**</i>   | 0.2                                          | 0.2            |
|                     | <i>learning_rate</i>           | ['constant', 'adaptive']                     | 'constant'     |
|                     | <i>activation</i>              |                                              | 'relu'         |
|                     | <i>solver</i>                  |                                              | 'adam'         |
|                     | <i>learning_rate_init</i>      |                                              | 0.001          |
|                     | <i>power_t</i>                 |                                              | 0.5            |
|                     | <i>shuffle</i>                 |                                              | True           |
|                     | <i>tol</i>                     |                                              | 0.0001         |
|                     | <i>verbose</i>                 |                                              | False          |
|                     | <i>warm_start</i>              |                                              | False          |
|                     | <i>momentum</i>                |                                              | 0.9            |
|                     | <i>nesterovs_momentum</i>      |                                              | True           |

| Model (Multi-class) | Hyperparameter | Search space | Best parameter |
|---------------------|----------------|--------------|----------------|
|                     | <i>beta_1</i>  |              | 0.9            |
|                     | <i>beta_2</i>  |              | 0.999          |
|                     | <i>epsilon</i> |              | 0.00000007     |
|                     | <i>max_fun</i> |              | 15000          |

We explicitly set the parameters to train a main effect multinomial logistic regression (mLR) model. No tuning was performed for this model. Values of these hyperparameters were fixed during the training.

Hyperparameter for binary problems to account for an imbalance dataset, thus instead, we used the 'compute\_sample\_weight' function from SKlearn library [1]. *Italic* indicates hyperparameters set to default.

## S2 Table Reference

1. Pedregosa F, Varoquaux G, Gramfort A, Michel V, Thirion B, Grisel O, et al. Scikit-learn: Machine Learning in Python. J Mach Learn Res. 2011;12(85):2825–30.
