# Supplementary material for: Developing machine learning models to predict multi-class functional outcomes and death three months after stroke in Sweden
Source: PubMed Central journal article supplement (PMC11090298; doi:10.1371/journal.pone.0303287), 2024-05-13
Supplement: pone.0303287.s006.pdf [file pone.0303287.s006.pdf]

**S3A Table. Estimates (with 95% confidence interval (CI)) for the Model Performance**

**Metrics in the test set.**

| Performance indicators [95% CI]/ Models | Multinomial LR                       | Multinomial LR with interaction terms | XGBoost                              | SVM                                  | ANN                                  |
|-----------------------------------------|--------------------------------------|---------------------------------------|--------------------------------------|--------------------------------------|--------------------------------------|
| Accuracy                                | 0.689 <sup>4</sup><br>[0.684, 0.695] | 0.690 <sup>3</sup><br>[0.684, 0.696]  | 0.694 <sup>2</sup><br>[0.688, 0.699] | 0.688 <sup>5</sup><br>[0.683, 0.694] | 0.698 <sup>1</sup><br>[0.693, 0.704] |
| Cohen-Kappa coefficient                 | 0.518 <sup>3</sup><br>[0.509, 0.526] | 0.517 <sup>4</sup><br>[0.508, 0.526]  | 0.526 <sup>1</sup><br>[0.517, 0.534] | 0.516 <sup>5</sup><br>[0.507, 0.524] | 0.526 <sup>1</sup><br>[0.517, 0.535] |
| Matthews correlation coefficient        | 0.522 <sup>4</sup><br>[0.514, 0.531] | 0.523 <sup>3</sup><br>[0.513, 0.531]  | 0.527 <sup>1</sup><br>[0.519, 0.536] | 0.522 <sup>4</sup><br>[0.514, 0.531] | 0.527 <sup>1</sup><br>[0.518, 0.536] |
| F1-score                                |                                      |                                       |                                      |                                      |                                      |
| <i>mRS 0–2</i>                          | 0.796 <sup>2</sup><br>[0.790, 0.801] | 0.795 <sup>3</sup><br>[0.789, 0.800]  | 0.794 <sup>4</sup><br>[0.788, 0.800] | 0.797 <sup>1</sup><br>[0.791, 0.803] | 0.793 <sup>5</sup><br>[0.788, 0.799] |
| <i>mRS 3–5</i>                          | 0.554 <sup>3</sup><br>[0.545, 0.563] | 0.552 <sup>4</sup><br>[0.542, 0.562]  | 0.577 <sup>2</sup><br>[0.568, 0.586] | 0.541 <sup>5</sup><br>[0.532, 0.551] | 0.603 <sup>1</sup><br>[0.594, 0.611] |
| <i>mRS 6</i>                            | 0.667 <sup>3</sup><br>[0.656, 0.676] | 0.669 <sup>2</sup><br>[0.658, 0.679]  | 0.671 <sup>1</sup><br>[0.660, 0.680] | 0.667 <sup>3</sup><br>[0.657, 0.677] | 0.657 <sup>5</sup><br>[0.646, 0.668] |
| <i>Macro average</i>                    | 0.672 <sup>3</sup><br>[0.666, 0.678] | 0.672 <sup>3</sup><br>[0.666, 0.678]  | 0.681 <sup>2</sup><br>[0.675, 0.687] | 0.668 <sup>5</sup><br>[0.663, 0.674] | 0.685 <sup>1</sup><br>[0.678, 0.691] |
| <i>Weighted average</i>                 | 0.681 <sup>3</sup><br>[0.675, 0.687] | 0.680 <sup>4</sup><br>[0.674, 0.686]  | 0.690 <sup>2</sup><br>[0.684, 0.695] | 0.677 <sup>5</sup><br>[0.671, 0.683] | 0.696 <sup>1</sup><br>[0.690, 0.702] |
| Sensitivity (Recall)                    |                                      |                                       |                                      |                                      |                                      |
| <i>mRS 0–2</i>                          | 0.848 <sup>3</sup><br>[0.842, 0.855] | 0.859 <sup>2</sup><br>[0.853, 0.865]  | 0.826 <sup>5</sup><br>[0.818, 0.833] | 0.865 <sup>1</sup><br>[0.859, 0.872] | 0.830 <sup>4</sup><br>[0.823, 0.837] |
| <i>mRS 3–5</i>                          | 0.489 <sup>3</sup><br>[0.479, 0.500] | 0.483 <sup>4</sup><br>[0.474, 0.494]  | 0.534 <sup>2</sup><br>[0.524, 0.545] | 0.464 <sup>5</sup><br>[0.455, 0.475] | 0.598 <sup>1</sup><br>[0.588, 0.609] |
| <i>mRS 6</i>                            | 0.710 <sup>2</sup><br>[0.697, 0.722] | 0.701 <sup>4</sup><br>[0.688, 0.713]  | 0.702 <sup>3</sup><br>[0.689, 0.715] | 0.713 <sup>1</sup><br>[0.700, 0.725] | 0.607 <sup>5</sup><br>[0.592, 0.620] |
| <i>Macro average</i>                    | 0.682 <sup>2</sup><br>[0.677, 0.688] | 0.681 <sup>3</sup><br>[0.675, 0.687]  | 0.687 <sup>1</sup><br>[0.681, 0.693] | 0.681 <sup>3</sup><br>[0.675, 0.687] | 0.678 <sup>5</sup><br>[0.672, 0.684] |
| <i>Weighted average</i>                 | 0.689 <sup>4</sup><br>[0.684, 0.695] | 0.690 <sup>3</sup><br>[0.684, 0.696]  | 0.694 <sup>2</sup><br>[0.688, 0.699] | 0.688 <sup>5</sup><br>[0.683, 0.694] | 0.698 <sup>1</sup><br>[0.693, 0.704] |
| Precision (PPV)                         |                                      |                                       |                                      |                                      |                                      |
| <i>mRS 0–2</i>                          | 0.749 <sup>3</sup><br>[0.742, 0.757] | 0.739 <sup>4</sup><br>[0.732, 0.747]  | 0.765 <sup>1</sup><br>[0.758, 0.773] | 0.739 <sup>4</sup><br>[0.732, 0.747] | 0.760 <sup>2</sup><br>[0.753, 0.768] |

|                         |                                      |                                      |                                      |                                      |                                      |
|-------------------------|--------------------------------------|--------------------------------------|--------------------------------------|--------------------------------------|--------------------------------------|
| <i>mRS 3–5</i>          | 0.639 <sup>3</sup><br>[0.627, 0.650] | 0.644 <sup>2</sup><br>[0.631, 0.655] | 0.628 <sup>4</sup><br>[0.618, 0.639] | 0.650 <sup>1</sup><br>[0.638, 0.661] | 0.608 <sup>5</sup><br>[0.597, 0.618] |
| <i>mRS 6</i>            | 0.629 <sup>4</sup><br>[0.616, 0.641] | 0.639 <sup>3</sup><br>[0.626, 0.651] | 0.641 <sup>2</sup><br>[0.629, 0.654] | 0.626 <sup>5</sup><br>[0.613, 0.638] | 0.717 <sup>1</sup><br>[0.705, 0.730] |
| <i>Macro average</i>    | 0.672 <sup>4</sup><br>[0.666, 0.678] | 0.674 <sup>3</sup><br>[0.667, 0.680] | 0.678 <sup>2</sup><br>[0.672, 0.684] | 0.672 <sup>4</sup><br>[0.666, 0.678] | 0.695 <sup>1</sup><br>[0.689, 0.701] |
| <i>Weighted average</i> | 0.683 <sup>3</sup><br>[0.678, 0.689] | 0.683 <sup>3</sup><br>[0.677, 0.689] | 0.689 <sup>2</sup><br>[0.683, 0.695] | 0.682 <sup>5</sup><br>[0.677, 0.689] | 0.696 <sup>1</sup><br>[0.690, 0.702] |

<sup>1,2,3,4,5</sup> are the ranking of the model prediction performances based on the respective metrics. PPV; positive predictive value.

**S3B Table. Estimates (with 95% confidence interval (CI)) for the Model Performance**

**Metrics in the training set.**

| Performance indicators [95% CI]/ Models | Multinomial LR                       | Multinomial LR with interaction terms | XGBoost                              | SVM                                  | ANN                                  |
|-----------------------------------------|--------------------------------------|---------------------------------------|--------------------------------------|--------------------------------------|--------------------------------------|
| Accuracy                                | 0.687 <sup>5</sup><br>[0.683, 0.690] | 0.690 <sup>4</sup><br>[0.686, 0.693]  | 0.704 <sup>1</sup><br>[0.701, 0.707] | 0.693 <sup>3</sup><br>[0.690, 0.696] | 0.702 <sup>2</sup><br>[0.699, 0.705] |
| Cohen-Kappa coefficient                 | 0.514 <sup>5</sup><br>[0.508, 0.519] | 0.517 <sup>4</sup><br>[0.512, 0.522]  | 0.541 <sup>1</sup><br>[0.536, 0.546] | 0.522 <sup>3</sup><br>[0.516, 0.526] | 0.530 <sup>2</sup><br>[0.525, 0.535] |
| Matthews correlation coefficient        | 0.517 <sup>5</sup><br>[0.512, 0.523] | 0.522 <sup>4</sup><br>[0.517, 0.527]  | 0.543 <sup>1</sup><br>[0.538, 0.548] | 0.529 <sup>3</sup><br>[0.524, 0.534] | 0.533 <sup>2</sup><br>[0.528, 0.537] |
| F1-score                                |                                      |                                       |                                      |                                      |                                      |
| <i>mRS 0–2</i>                          | 0.792 <sup>5</sup><br>[0.788, 0.795] | 0.793 <sup>4</sup><br>[0.790, 0.797]  | 0.796 <sup>2</sup><br>[0.793, 0.800] | 0.796 <sup>2</sup><br>[0.792, 0.799] | 0.799 <sup>1</sup><br>[0.795, 0.802] |
| <i>mRS 3–5</i>                          | 0.553 <sup>4</sup><br>[0.548, 0.559] | 0.554 <sup>3</sup><br>[0.549, 0.560]  | 0.592 <sup>2</sup><br>[0.587, 0.597] | 0.551 <sup>5</sup><br>[0.546, 0.556] | 0.605 <sup>1</sup><br>[0.600, 0.610] |
| <i>mRS 6</i>                            | 0.665 <sup>4</sup><br>[0.660, 0.671] | 0.670 <sup>3</sup><br>[0.664, 0.675]  | 0.689 <sup>1</sup><br>[0.684, 0.695] | 0.676 <sup>2</sup><br>[0.670, 0.681] | 0.650 <sup>5</sup><br>[0.644, 0.656] |
| <i>Macro average</i>                    | 0.670 <sup>5</sup><br>[0.667, 0.674] | 0.672 <sup>4</sup><br>[0.669, 0.676]  | 0.693 <sup>1</sup><br>[0.689, 0.696] | 0.674 <sup>3</sup><br>[0.671, 0.678] | 0.685 <sup>2</sup><br>[0.681, 0.688] |
| <i>Weighted average</i>                 | 0.679 <sup>5</sup><br>[0.675, 0.682] | 0.681 <sup>4</sup><br>[0.677, 0.684]  | 0.700 <sup>1</sup><br>[0.696, 0.703] | 0.682 <sup>3</sup><br>[0.678, 0.685] | 0.697 <sup>2</sup><br>[0.694, 0.700] |
| Sensitivity (Recall)                    |                                      |                                       |                                      |                                      |                                      |
| <i>mRS 0–2</i>                          | 0.841 <sup>4</sup><br>[0.837, 0.845] | 0.855 <sup>3</sup><br>[0.851, 0.859]  | 0.825 <sup>5</sup><br>[0.821, 0.828] | 0.874 <sup>1</sup><br>[0.870, 0.877] | 0.861 <sup>2</sup><br>[0.857, 0.864] |
| <i>mRS 3–5</i>                          | 0.492 <sup>3</sup><br>[0.486, 0.498] | 0.488 <sup>4</sup><br>[0.482, 0.494]  | 0.549 <sup>2</sup><br>[0.543, 0.555] | 0.474 <sup>5</sup><br>[0.468, 0.480] | 0.590 <sup>1</sup><br>[0.584, 0.596] |
| <i>mRS 6</i>                            | 0.707 <sup>2</sup><br>[0.699, 0.714] | 0.700 <sup>4</sup><br>[0.693, 0.707]  | 0.724 <sup>1</sup><br>[0.718, 0.731] | 0.703 <sup>3</sup><br>[0.696, 0.711] | 0.579 <sup>5</sup><br>[0.571, 0.587] |
| <i>Macro average</i>                    | 0.680 <sup>4</sup><br>[0.676, 0.683] | 0.681 <sup>3</sup><br>[0.678, 0.684]  | 0.699 <sup>1</sup><br>[0.696, 0.703] | 0.684 <sup>2</sup><br>[0.680, 0.687] | 0.676 <sup>5</sup><br>[0.673, 0.680] |
| <i>Weighted average</i>                 | 0.687 <sup>5</sup><br>[0.683, 0.690] | 0.690 <sup>4</sup><br>[0.686, 0.693]  | 0.704 <sup>1</sup><br>[0.701, 0.707] | 0.693 <sup>3</sup><br>[0.690, 0.696] | 0.702 <sup>2</sup><br>[0.699, 0.705] |
| Precision (PPV)                         |                                      |                                       |                                      |                                      |                                      |
| <i>mRS 0–2</i>                          | 0.748 <sup>2</sup><br>[0.744, 0.753] | 0.740 <sup>4</sup><br>[0.735, 0.745]  | 0.770 <sup>1</sup><br>[0.766, 0.775] | 0.730 <sup>5</sup><br>[0.726, 0.735] | 0.745 <sup>3</sup><br>[0.741, 0.750] |

|                         |                                      |                                      |                                      |                                      |                                      |
|-------------------------|--------------------------------------|--------------------------------------|--------------------------------------|--------------------------------------|--------------------------------------|
| <i>mRS 3–5</i>          | 0.632 <sup>4</sup><br>[0.626, 0.639] | 0.641 <sup>3</sup><br>[0.634, 0.647] | 0.642 <sup>2</sup><br>[0.636, 0.648] | 0.659 <sup>1</sup><br>[0.652, 0.666] | 0.621 <sup>5</sup><br>[0.616, 0.627] |
| <i>mRS 6</i>            | 0.628 <sup>5</sup><br>[0.621, 0.635] | 0.642 <sup>4</sup><br>[0.635, 0.649] | 0.657 <sup>2</sup><br>[0.650, 0.664] | 0.650 <sup>3</sup><br>[0.643, 0.657] | 0.741 <sup>1</sup><br>[0.734, 0.748] |
| <i>Macro average</i>    | 0.669 <sup>5</sup><br>[0.666, 0.673] | 0.674 <sup>4</sup><br>[0.671, 0.678] | 0.690 <sup>2</sup><br>[0.687, 0.693] | 0.680 <sup>3</sup><br>[0.676, 0.683] | 0.703 <sup>1</sup><br>[0.699, 0.706] |
| <i>Weighted average</i> | 0.681 <sup>5</sup><br>[0.677, 0.684] | 0.683 <sup>4</sup><br>[0.680, 0.686] | 0.700 <sup>1</sup><br>[0.696, 0.703] | 0.687 <sup>3</sup><br>[0.684, 0.691] | 0.700 <sup>1</sup><br>[0.696, 0.703] |

<sup>1,2,3,4,5</sup> are the ranking of the model prediction performances based on the respective metrics. PPV; positive predictive value.
