# Supplementary material for: Developing machine learning models to predict multi-class functional outcomes and death three months after stroke in Sweden
Source: PubMed Central journal article supplement (PMC11090298; doi:10.1371/journal.pone.0303287), 2024-05-13
Supplement: pone.0303287.s007.pdf [file pone.0303287.s007.pdf]

**S4 Table. Estimated odds ratios (exp(regression slope coefficients)) from the main-effects multinomial LR model.** The estimates indicate how a unit increase in the covariate is associated with the odds of belonging to a particular mRS level, keeping other covariates fixed.  $OR = 1$  means that the covariate is not associated with odds of the corresponding mRS level,  $OR > 1$  means that there is increased occurrence of the corresponding mRS level as the covariate increases (or at that level of covariate), and  $OR < 1$  indicates that the corresponding mRS level is less likely to occur as the covariate increases (or at that level of covariate).

| Covariates / Coefficients          | mRS level      |              |         |
|------------------------------------|----------------|--------------|---------|
|                                    | 0: Independent | 1: Dependent | 2: Dead |
| Age                                | 0.958          | 1.004        | 1.040   |
| Sex                                | 1.125          | 0.820        | 1.085   |
| <i>Inpatient at time of Stroke</i> |                |              |         |
| Yes                                | 0.454          | 0.885        | 2.491   |
| Unknown                            | 1.000          | 0.936        | 1.069   |
| Hour of Admission                  |                |              |         |
| <i>040000to075959</i>              |                |              |         |
| Yes                                | 0.984          | 0.982        | 1.035   |
| Unknown                            | 0.981          | 1.028        | 0.991   |
| <i>080000to115959</i>              |                |              |         |
| Yes                                | 1.060          | 1.016        | 0.928   |
| Unknown                            | 0.981          | 1.028        | 0.991   |
| <i>120000to155959</i>              |                |              |         |
| Yes                                | 1.001          | 1.099        | 0.909   |
| Unknown                            | 0.981          | 1.028        | 0.991   |
| <i>160000to195959</i>              |                |              |         |
| Yes                                | 0.963          | 1.099        | 0.945   |
| Unknown                            | 0.981          | 1.028        | 0.991   |
| <i>200000to235959</i>              |                |              |         |
| Yes                                | 0.939          | 1.075        | 0.992   |
| Unknown                            | 0.981          | 1.028        | 0.991   |
| Day of week of Admission           |                |              |         |
| <i>Monday</i>                      |                |              |         |
| Yes                                | 1.059          | 0.983        | 0.960   |
| Unknown                            | 1.366          | 1.246        | 0.588   |
| <i>Tuesday</i>                     |                |              |         |
| Yes                                | 1.055          | 0.964        | 0.983   |
| Unknown                            | 1.366          | 1.246        | 0.588   |
| <i>Wednesday</i>                   |                |              |         |
| Yes                                | 1.054          | 0.987        | 0.961   |

| Covariates / Coefficients       | mRS level      |              |         |
|---------------------------------|----------------|--------------|---------|
|                                 | 0: Independent | 1: Dependent | 2: Dead |
| Unknown                         | 1.366          | 1.246        | 0.588   |
| <i>Thursday</i>                 |                |              |         |
| Yes                             | 1.069          | 0.959        | 0.976   |
| Unknown                         | 1.366          | 1.246        | 0.588   |
| <i>Friday</i>                   |                |              |         |
| Yes                             | 1.045          | 0.950        | 1.007   |
| Unknown                         | 1.366          | 1.246        | 0.588   |
| <i>Saturday</i>                 |                |              |         |
| Yes                             | 1.020          | 0.961        | 1.020   |
| Unknown                         | 1.366          | 1.246        | 0.588   |
| <i>Hypertension</i>             |                |              |         |
| Yes                             | 1.000          | 1.023        | 0.977   |
| Unknown                         | 0.888          | 0.999        | 1.127   |
| <i>Atrial Fibrillation (AF)</i> |                |              |         |
| Yes                             | 0.890          | 0.990        | 1.135   |
| Unknown                         | 0.670          | 0.850        | 1.757   |
| <i>Diabetes</i>                 |                |              |         |
| Yes                             | 0.712          | 1.156        | 1.214   |
| Unknown                         | 1.222          | 0.780        | 1.049   |
| <i>Previous Stroke-TIA</i>      |                |              |         |
| Yes                             | 0.807          | 1.149        | 1.078   |
| Unknown                         | 1.020          | 1.043        | 0.940   |
| <i>Prior-anticoagulation</i>    |                |              |         |
| Yes                             | 0.912          | 1.003        | 1.094   |
| Unknown                         | 0.578          | 1.135        | 1.524   |
| <i>Prior mRS</i>                |                |              |         |
| 3                               | 0.247          | 2.006        | 2.019   |
| 4                               | 0.088          | 2.487        | 4.579   |
| 5                               | 0.021          | 3.960        | 12.167  |
| Unknown                         | 0.207          | 1.238        | 3.897   |
| NIHSS at admission              | 0.882          | 1.005        | 1.128   |
| <i>Type of Stroke:</i>          |                |              |         |
| Haemorrhage                     | 0.541          | 1.006        | 1.838   |
| Unknown                         | 0.882          | 0.805        | 1.407   |
| <i>Smoking</i>                  |                |              |         |
| Yes                             | 0.768          | 1.098        | 1.186   |
| Unknown                         | 0.799          | 0.938        | 1.334   |
| <i>Lipid</i>                    |                |              |         |
| Yes                             | 1.147          | 0.984        | 0.886   |
| Unknown                         | 1.037          | 0.609        | 1.585   |

| Covariates / Coefficients | mRS level      |              |         |
|---------------------------|----------------|--------------|---------|
|                           | 0: Independent | 1: Dependent | 2: Dead |
| <i>Wake-up Stroke</i>     |                |              |         |
| Yes                       | 1.021          | 1.041        | 0.941   |
| Unknown                   | 0.629          | 1.148        | 1.386   |
| <i>Stroke Alert</i>       |                |              |         |
| Yes                       | 1.338          | 0.972        | 0.769   |
| Unknown                   | 1.143          | 1.018        | 0.859   |
| <i>Ambulance</i>          |                |              |         |
| Yes                       | 0.574          | 1.154        | 1.508   |
| Unknown                   | 0.829          | 1.129        | 1.068   |
